# Supplementary material for: First-principles study on the catalytic performance of transition metal atom-doped CrSe2 for the oxygen reduction reaction
Source: Royal Society of Chemistry journal article supplement (doi:10.1039/d3cp00223c), 2023-01-01
Supplement: d3cp00223c1.pdf [file d3cp00223c1.pdf]

## Supporting Information

### **First-principles Study on the Catalytic Performance of Transition Metal Atom doped CrSe<sub>2</sub> for Oxygen Reduction Reaction**

Long Lin<sup>a,b</sup>, Yadan Sun<sup>a</sup>, Kun Xie<sup>a</sup>, Pei Shi<sup>a</sup>, Xinyu Yang<sup>a</sup>, Dongbin Wang<sup>\*c</sup>

<sup>a</sup> *Cultivating Base for Key Laboratory of Environment-Friendly Inorganic Materials in Henan Province, School of Materials Science and Engineering, Henan Polytechnic University, Jiaozuo 454000, China*

<sup>b</sup> *School of Mathematics and Informatics, Henan Polytechnic University, Jiaozuo 454000, China*

<sup>\*c</sup> *School of Materials Science and Engineering, Henan Polytechnic University, Jiaozuo 454000, China. Email: wdbyxr@163.com*

Corresponding author: *wdbyxr@163.com*

Table S1. The parameters of the adsorption energy ( $E_{\text{ads}}$ ), adsorption height and the difference of the distance of O-O ( $\Delta d$ ) of  $\text{O}_2$  after its adsorption on the surface of intrinsic  $\text{CrSe}_2$ , where site I, II, III, IV represents the top site of Cr, the top of Se from the top layer, the bridge site of Cr-Se, the top of Se from the bottom layer, respectively.

| Configuration |      | $E_{\text{ads}}$ (eV) | Height (Å) | $\Delta d$ (Å) |
|---------------|------|-----------------------|------------|----------------|
| Orientation   | Site |                       |            |                |
| End-on        | I    | 0.483                 | 2.859      | 0.019          |
|               | II   | 0.046                 | 2.491      | 0.020          |
|               | III  | -0.122                | 2.647      | 0.011          |
|               | IV   | -0.112                | 2.498      | 0.013          |
| Side-on       | I    | -0.494                | 3.019      | 0.006          |
|               | II   | -0.133                | 2.758      | 0.014          |
|               | III  | -0.110                | 2.788      | 0.013          |
|               | IV   | -0.100                | 2.683      | 0.014          |

Table S2. The formation energy ( $E_f$ ) of different TM atom.

| Doped TM | $E_f$ (eV) |
|----------|------------|
| Rh       | -1.098     |
| Pd       | -0.372     |
| Ag       | 0.650      |
| Ir       | -2.196     |
| Pt       | -1.867     |
| Au       | -0.201     |

Table S3. The adsorption energy ( $E_{\text{ads}}$ ) of  $\text{O}_2$  on different sites of TM-doped  $\text{CrSe}_2$  systems, the distance between O-O ( $d_{\text{O-O}}$ ), and the Bader charge transfer ( $\Delta Q$ ).

| System               | Configuration |      | $E_{\text{ads}}$ (eV) | $d_{\text{O-O}}$ (Å) | $\Delta Q$ (e) |              |           |
|----------------------|---------------|------|-----------------------|----------------------|----------------|--------------|-----------|
|                      | Orientation   | Site |                       |                      | TM             | $\text{O}_2$ | Substrate |
| Rh-CrSe <sub>2</sub> | Side-on       | B    | -1.505                | 1.292                | -0.142         | 0.399        | -0.256    |
|                      |               | T    | -2.008                | 1.399                | -0.292         | 0.645        | -0.353    |
|                      | End-on        | B    | -1.394                | 1.296                | -0.129         | 0.353        | -0.223    |
|                      |               | T    | -1.661                | 1.294                | -0.138         | 0.405        | -0.267    |
| Pd-CrSe <sub>2</sub> | Side-on       | B    | -0.422                | 1.275                | -0.041         | 0.207        | -0.166    |
|                      |               | T    | -0.336                | 1.266                | -0.061         | 0.227        | -0.166    |
|                      | End-on        | B    | -0.431                | 1.285                | -0.043         | 0.314        | -0.271    |
|                      |               | T    | -0.117                | 1.259                | -0.017         | 0.216        | -0.199    |
| Ir-CrSe <sub>2</sub> | Side-on       | B    | -1.249                | 1.300                | -0.020         | 0.439        | -0.418    |
|                      |               | T    | -1.754                | 1.449                | -0.239         | 0.706        | -0.467    |
|                      | End-on        | B    | -1.203                | 1.303                | 0.027          | 0.408        | -0.435    |
|                      |               | T    | -1.246                | 1.301                | -0.017         | 0.443        | -0.426    |
| Pt-CrSe <sub>2</sub> | Side-on       | B    | -0.692                | 1.295                | 0.144          | 0.368        | -0.513    |
|                      |               | T    | -0.198                | 1.294                | 0.139          | 0.363        | -0.502    |
|                      | End-on        | B    | 0.385                 | 1.238                | 0.461          | 0.120        | -0.580    |
|                      |               | T    | -0.140                | 1.294                | 0.139          | 0.359        | -0.498    |

Table S4.  $\Delta G$  of intermediates adsorption and the four reaction steps, as well as the overpotentials ( $\eta$ ) of ORR on TM-doped CrSe<sub>2</sub>.

| System                               | $\Delta G_{\text{OOH}^*}$<br>(eV) | $\Delta G_{\text{O}^*}$<br>(eV) | $\Delta G_{\text{OH}^*}$<br>(eV) | $\Delta G_1$<br>(eV) | $\Delta G_2$<br>(eV) | $\Delta G_3$<br>(eV) | $\Delta G_4$<br>(eV) | $\eta^{\text{ORR}}$ (V) |
|--------------------------------------|-----------------------------------|---------------------------------|----------------------------------|----------------------|----------------------|----------------------|----------------------|-------------------------|
| Rh <sub>S_T</sub> -CrSe <sub>2</sub> | 2.483                             | 0.445                           | -0.562                           | -2.437               | -2.038               | -1.007               | 0.562                | 1.79                    |
| Ir <sub>S_T</sub> -CrSe <sub>2</sub> | 3.120                             | 0.256                           | -0.134                           | -1.800               | -2.864               | -0.390               | 0.134                | 1.36                    |
| Pt <sub>S_B</sub> -CrSe <sub>2</sub> | 4.006                             | 1.666                           | 0.937                            | -0.914               | -2.340               | -0.729               | -0.937               | 0.50                    |
| Pd <sub>E_B</sub> -CrSe <sub>2</sub> | 3.808                             | 2.617                           | 0.799                            | -1.112               | -1.190               | -1.819               | -0.799               | 0.43                    |

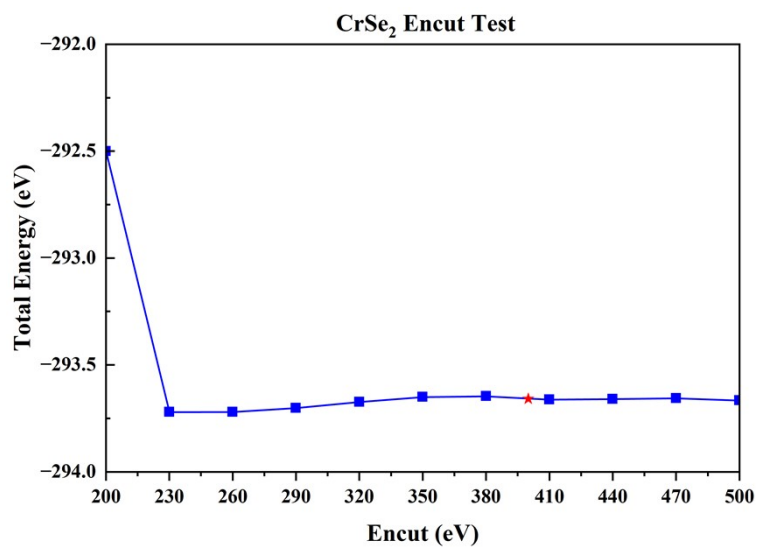

Fig. S1. The cutoff energy test results from 200 to 500 eV, with an interval of 30 eV.

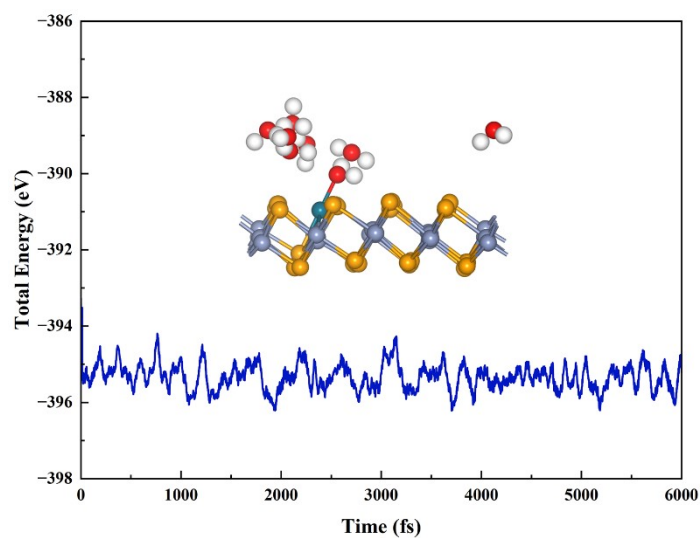

Fig. S2. The total energy variation and the configuration of Pd-CrSe<sub>2</sub> at 300 K under AIMD simulation.

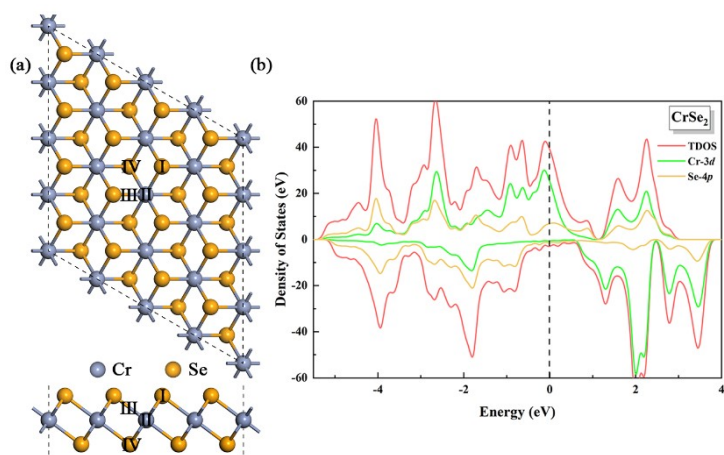

Fig. S3. The optimized structure, the adsorption sites, and the density of states (DOS) of the intrinsic CrSe<sub>2</sub>.

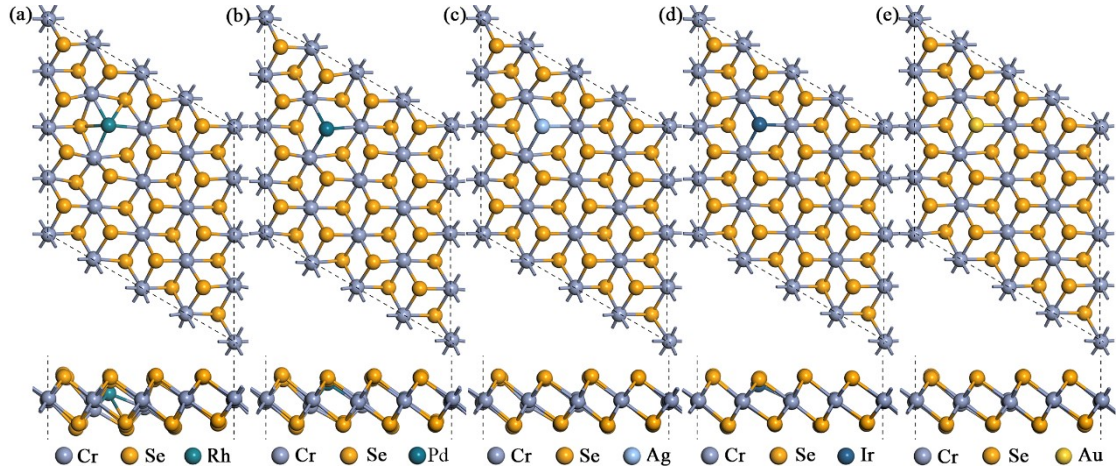

Fig. S4. (a)-(e) The optimized structure of Rh-CrSe<sub>2</sub>, Pd-CrSe<sub>2</sub>, Ag-CrSe<sub>2</sub>, Ir-CrSe<sub>2</sub>, Au-CrSe<sub>2</sub>, respectively.

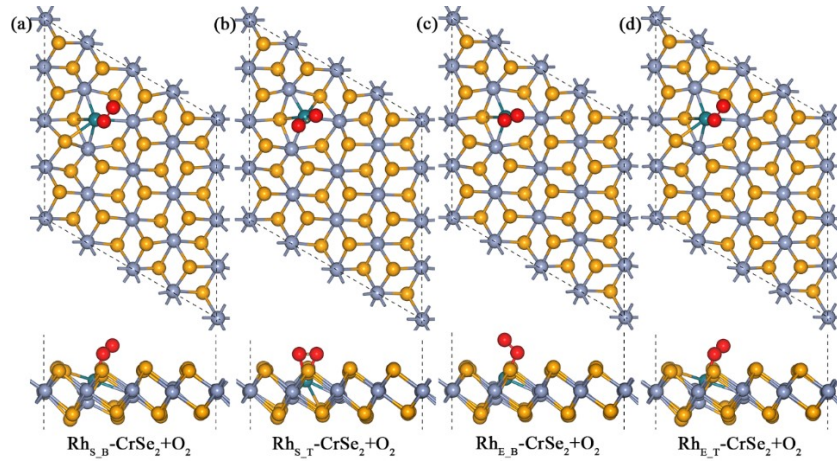

Fig. S5. Top and side views of O<sub>2</sub> adsorbed on the different sites of Rh-CrSe<sub>2</sub>, (a) S<sub>B</sub> (b) S<sub>T</sub>, (c) E<sub>B</sub>, (d) E<sub>T</sub>, respectively.

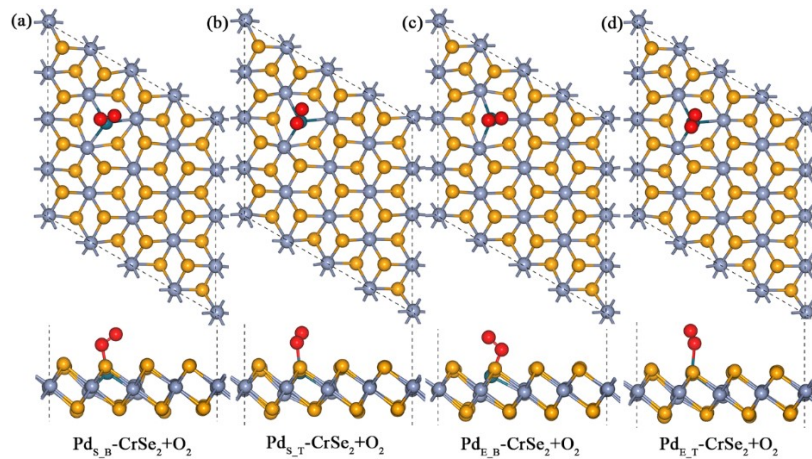

Fig. S6. Top and side views of O<sub>2</sub> adsorbed on the different sites of Pd-CrSe<sub>2</sub>, (a) S<sub>B</sub> (b) S<sub>T</sub>, (c) E<sub>B</sub>, (d) E<sub>T</sub>, respectively.



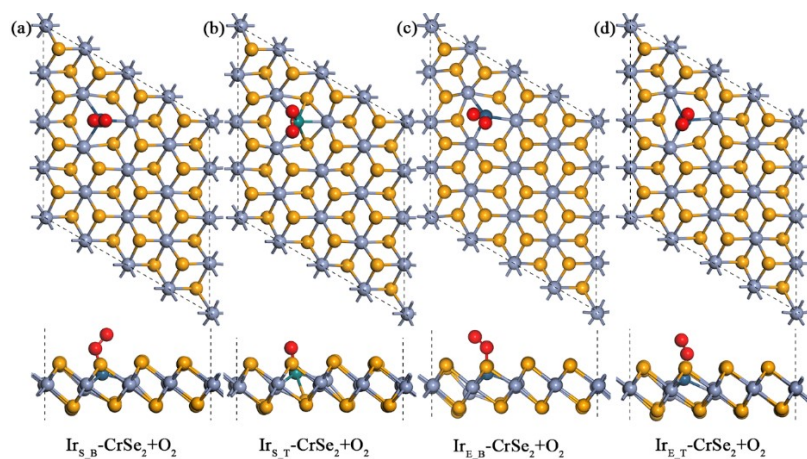

Fig. S7. Top and side views of  $O_2$  adsorbed on the different sites of Ir-CrSe<sub>2</sub>, (a) S\_B (b) S\_T, (c) E\_B, (d) E\_T, respectively.

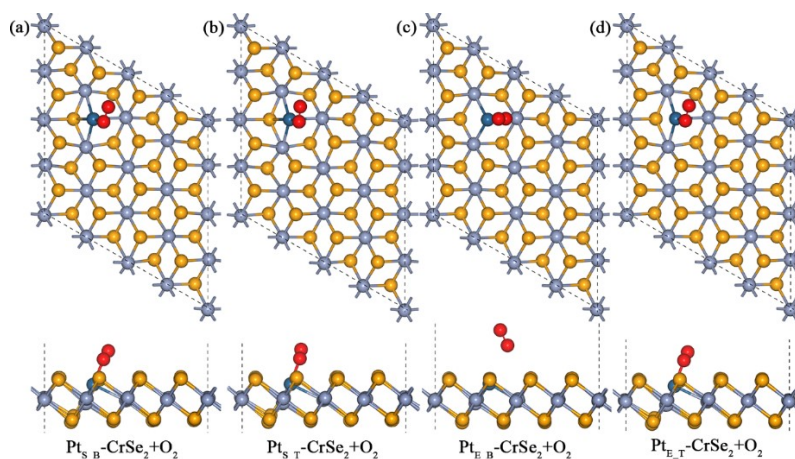

Fig. S8. Top and side views of  $O_2$  adsorbed on the different sites of Pt-CrSe<sub>2</sub>, (a) S\_B (b) S\_T, (c) E\_B, (d) E\_T, respectively.

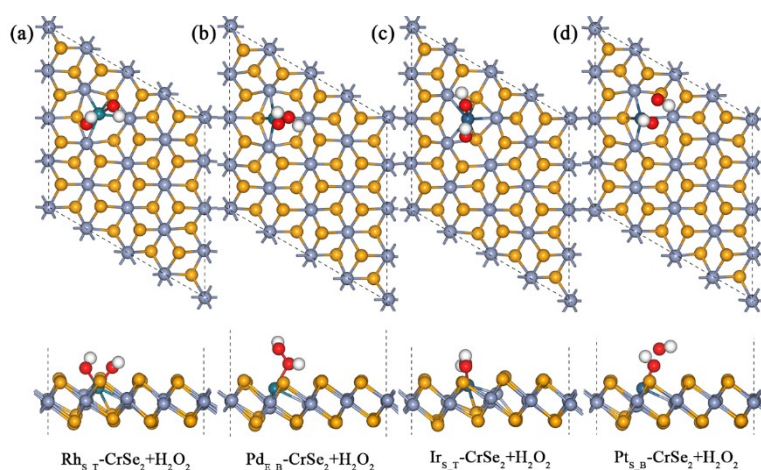

Fig. S9. The optimized structures of  $H_2O_2$  adsorbed on the surface of (a) Rh<sub>S\_T</sub>-CrSe<sub>2</sub>, (b) Pd<sub>E\_B</sub>-CrSe<sub>2</sub>, (c) Ir<sub>S\_T</sub>-CrSe<sub>2</sub>, (d) Pt<sub>S\_B</sub>-CrSe<sub>2</sub>, respectively.



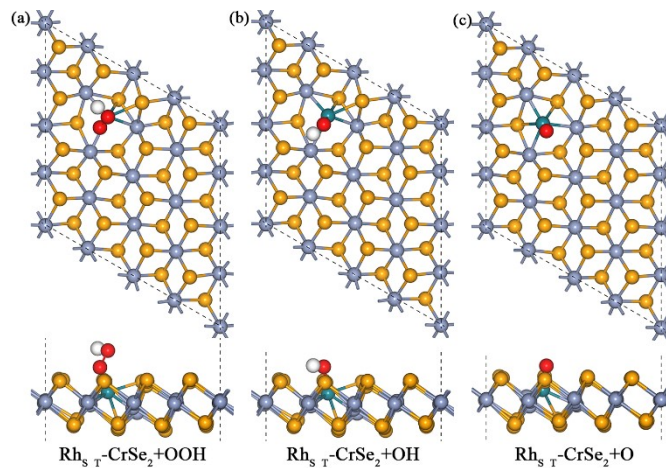

Fig. S10. The ORR intermediates adsorbed on  $\text{Rh}_{\text{S}_T}\text{-CrSe}_2$ .

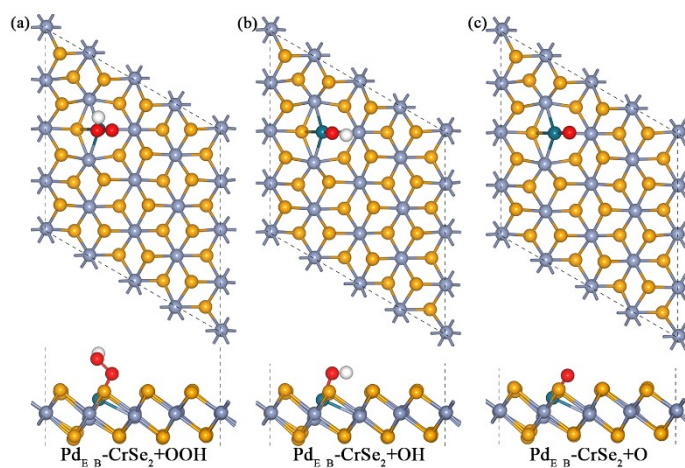

Fig. S11. The ORR intermediates adsorbed on  $\text{Pd}_{\text{E}_B}\text{-CrSe}_2$ .

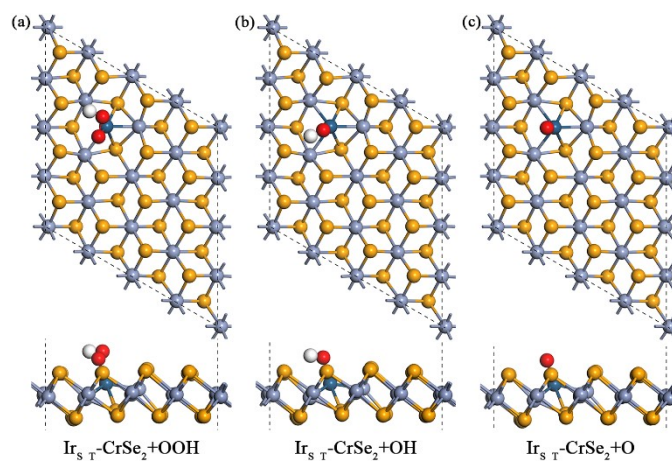

Fig. S12. The ORR intermediates adsorbed on  $\text{Ir}_{\text{S}_T}\text{-CrSe}_2$ .
